# Supplementary material for: A machine learning model that classifies breast cancer pathologic complete response on MRI post-neoadjuvant chemotherapy
Source: Springer Nature journal article supplement (doi:10.1186/s13058-020-01291-w), 2020-05-28
Supplement: MOESM2 [file 18026580]

## ADDITIONAL FILE 2

**Supplemental Table 1:** NAC Breast MRI protocol used in all patients.

| Series Descriptor                      | T2-Weighted Fat-Saturated | T1-Weighted | Steady State DCE-MRI T1-Weighted Fat-Saturated |
|----------------------------------------|---------------------------|-------------|------------------------------------------------|
| In-Plane Resolution (mm <sup>2</sup> ) | 1.0 × 1.0                 | 1.0 × 1.0   | 1.0 × 1.0                                      |
| Slice (mm) Thickness                   | 3.0                       | 1.0         | 1.0                                            |
| TE/TR (ms)                             | 102/5200                  | 2.5/5.2     | 2.1/4.4                                        |
| Bandwidth (kHz)                        | 42                        | 63          | 83                                             |
| NEX                                    | 2                         | 1           | 1                                              |
| Acquired Matrix                        | 224 × 228                 | 300 × 300   | 300 × 300                                      |
| Acceleration Factor                    | 2.5                       | 2           | 2.5                                            |
| Number of time points                  | 1                         | 1           | Pre-contrast + 3 post-contrast                 |

Abbreviations: DCE-MRI, dynamic contrast-enhanced magnetic resonance imaging; NAC, neoadjuvant chemotherapy

**Supplemental Table 2:** Median and inter-quartile range (IQR) between pCR and nCR among all the features selected as relevant by RFE-RF classifier for the Radiomics only Model 1 classifier.

Adjusted P values are shown. Actual values of the features are shown. Note that the classifier uses z-scale standardized features for placing uniform importance to features initially.

| Feature                                      | pCR median (IQR)     | nCR median (IQR)    | P values adjusted |
|----------------------------------------------|----------------------|---------------------|-------------------|
| Difference pre-contrast Mean                 | -0.10 (-0.44, 0.44)  | 0.30 (-0.03, 0.785) | < <b>0.001</b>    |
| Post-NAC pre-contrast Gabor(0, 1.414) mean   | 526 (322, 694)       | 467 (119, 752)      | 0.299             |
| Post-NAC post1 Gabor(90, 1.414) entropy      | -0.50 (-0.72, -0.13) | -0.32 (-0.67, 0.03) | <b>0.035</b>      |
| Post-NAC post1 homogeneity                   | 2091 (1389, 2720)    | 2325 (676, 3892)    | 0.969             |
| Post-NAC post1 mean                          | 14.0 (8.0, 19.0)     | 9.3 (5.5, 15.2)     | <b>0.003</b>      |
| Difference post2 skewness                    | 6.2 (3.2, 11.6)      | 3.5 (0.30, 8.2)     | <b>0.003</b>      |
| Post-NAC post1 Gabor(90, 1.414) energy       | 2186 (1418, 2885)    | 2488 (692, 4097)    | 0.969             |
| Post-NAC pre-contrast Gabor(0, 1.414) energy | 68.0 (49.0, 76.0)    | 56.0 (38.0, 71.0)   | 0.491             |

|                                                    |                    |                    |              |
|----------------------------------------------------|--------------------|--------------------|--------------|
| Post-NAC pre-contrast Gabor(90, 1.414) entropy     | 1944 (1250, 2439)  | 2036 (599, 3541)   | 0.984        |
| Difference post1 mean                              | 6.1 (3.2, 11.6)    | 3.5 (0.30, 8.20)   | <b>0.003</b> |
| Difference post1 Gabor (0, 1.414) energy           | 0.09 (-0.22, 0.58) | 0.47 (0.04, 0.88)  | <b>0.003</b> |
| Difference pre-contrast contrast                   | 6.1 (2.8, 11.4)    | 3.5 (0.34, 8.47)   | <b>0.007</b> |
| Post-NAC pre-contrast contrast                     | 13.0 (8.0, 18.0)   | 9.3 (5.5, 15.2)    | <b>0.007</b> |
| Pre-NAC post2 homogeneity                          | 6.8 (5.0, 9.7)     | 6.5 (4.3, 9.6)     | 0.392        |
| Post-NAC post1 SD                                  | 72.0 (59.0, 90.0)  | 60.0 (43.0, 79.0)  | <b>0.002</b> |
| Difference post1 Gabor (90, 1.414) contrast        | -228 (-861, 256)   | -50 (-540, 251)    | 0.206        |
| Pre-NAC post2 contrast                             | 32.0 (25.0, 42.0)  | 30.0 (23.0, 40.0)  | 0.589        |
| Pre-NAC pre-contrast Gabor (90, 1.414) correlation | 1155 (343, 1719)   | 983 (336, 1431)    | 0.299        |
| Difference post1 Gabor (90, 1.414) correlation     | 0.97 (-1.55, 5.10) | 0.72 (-1.21, 3.00) | 0.589        |

**Supplemental Table 3:** Median and inter-quartile range (IQR) between pCR and nCR among all the features selected as relevant by RFE-RF classifier for Model 2. Adjusted P values are shown. Actual values of the features are shown. Note that the classifier uses z-scale standardized features for placing uniform importance to features initially.

| Feature                                           | pCR median (IQR)    | nCR median (IQR)    | P values adjusted |
|---------------------------------------------------|---------------------|---------------------|-------------------|
| Difference pre-contrast Mean                      | -0.10 (-0.44, 0.44) | 0.30 (-0.03, 0.785) | < <b>0.001</b>    |
| Post-NAC post1 Gabor (90, 1.414) energy           | 2186 (1418, 2885)   | 2488 (692, 4097)    | 0.919             |
| Post-NAC pre-contrast Gabor (0, 1.414) contrast   | 526 (322, 692)      | 467 (119, 752)      | 0.270             |
| Pre-NAC pre-contrast Gabor (0, 1.414) homogeneity | 4.3 (3.4, 5.3)      | 4.6 (3.4, 5.9)      | 0.550             |
| Difference pre-contrast homogeneity               | 27.0 (11.0, 40.0)   | 14.9 (2.6, 31.4)    | <b>0.004</b>      |
| Post-NAC post1 homogeneity                        | 2091 (1389, 2720)   | 2325 (676, 3892)    | 0.92              |
| Post-NAC post2 Gabor (0, 1.414) correlation       | 62.0 (47.0, 74.0)   | 54.0 (41.0, 70.0)   | 0.082             |

|                                                  |                    |                    |               |
|--------------------------------------------------|--------------------|--------------------|---------------|
| Pre-NAC intra-tumor cluster entropy              | 1.5 (1.4, 1.6)     | 1.6 (1.5, 1.7)     | 0.150         |
| Difference pre-contrast Gabor (0, 1.414) entropy | 0.28 (-0.17, 0.78) | 0.31 (-0.24, 0.74) | 0.680         |
| Difference post2 skewness                        | 6.2 (3.2, 11.6)    | 3.5 (0.30, 8.20)   | <b>0.0025</b> |
| Difference post1 Gabor (0, 1.1414) energy        | 0.09 (-0.22, 0.58) | 0.47 (0.04, 0.88)  | <b>0.0025</b> |
| Difference post1 mean                            | 6.1 (3.2, 11.6)    | 3.5 (0.3, 8.2)     | <b>0.003</b>  |

**Supplemental Table 4:** Performance of the RFE-RF classifier trained using Radiomics only model without mean MRI intensity values for predicting a pCR. P values are derived from comparison of the ROC curves computed for the cross-validation and test sets and comparison against Radiomics model (Model 1).

|                             | <b>Radiomics without mean MRI intensity</b> |                   |
|-----------------------------|---------------------------------------------|-------------------|
|                             | <i>Training</i>                             | <i>Testing</i>    |
|                             | AUROC 95% CI                                | 0.71 (0.64, 0.79) |
| Sensitivity or TPR (no-pCR) | 0.73 (0.66, 0.80)                           | 0.79 (0.64, 0.90) |
| Specificity or TNR (pCR)    | 0.61 (0.47, 0.73)                           | 0.69 (0.39, 0.91) |
| PPV                         | 0.83 (0.76, 0.89)                           | 0.89 (0.75, 0.97) |
| NPV                         | 0.47 (0.36, 0.58)                           | 0.50 (0.42, 0.65) |
|                             | P-Value = 0.5                               |                   |
| Comparison against Model 1  | P-Value = 1.0                               | P-Value = 0.4     |

**Supplemental Table 5:** Median and inter-quartile range (IQR) between pCR and nCR among all the features selected as relevant by RFE-RF classifier for the Radiomics only Model3 classifier where mean features were removed. Adjusted P values are shown. Actual values of the features are shown. Note that the classifier uses z-scale standardized features for placing uniform importance to features initially.

| <b>Feature</b>                                        | <b>pCR median (IQR)</b> | <b>nCR median (IQR)</b> | <b>P values adjusted</b> |
|-------------------------------------------------------|-------------------------|-------------------------|--------------------------|
| Post-NAC post1 homogeneity                            | 2091 (1389, 2720)       | 2325 (676, 3892)        | 0.985                    |
| Post-NAC pre-contrast Gabor (0, 1.414) energy         | 1589 (919, 1965)        | 1521 (419, 2288)        | 0.443                    |
| Post-NAC pre-contrast Gabor (0, 1.414) contrast       | 526 (322, 694)          | 467 (119, 752)          | 0.290                    |
| Difference pre-contrast homogeneity                   | 27.0 (11.0, 40.0)       | 14.9 (2.6, 31.4)        | <b>0.009</b>             |
| Difference pre-contrast contrast                      | 6.1 (2.8, 11.4)         | 3.5 (0.34, 8.47)        | <b>0.012</b>             |
| Post-NAC pre-contrast Gabor (90, 1.414) entropy       | 1944 (1250, 2439)       | 2036 (599, 3541)        | 0.980                    |
| Difference post1 Gabor (0, 1.1414) energy             | 0.09 (-0.22, 0.58)      | 0.47 (0.04, 0.88)       | <b>0.007</b>             |
| Difference post1 kurtosis                             | 22.3 (4.6, 37.7)        | 15.0 (0.0, 30.0)        | 0.140                    |
| Difference pre-contrast Gabor (90, 1.414) correlation | -367 (-1117, 94)        | -121 (-683, 104)        | 0.110                    |
| Difference post1 Gabor (90, 1.414) mean               | -0.92 (-17.8, 13.9)     | 2.3 (-9.4, 15.6)        | 0.180                    |
| Pre-NAC post2 homogeneity                             | 6.8 (5.0, 9.7)          | 6.5 (4.3, 9.6)          | 0.370                    |
