# Supplementary material for: A machine learning model that classifies breast cancer pathologic complete response on MRI post-neoadjuvant chemotherapy
Source: Springer Nature journal article supplement (doi:10.1186/s13058-020-01291-w), 2020-05-28

### ADDITIONAL FILE 3

Supplemental Figure: Radiomic features associated with a pCR for the Radiomics only Model 1 classifier (A-I) and the radiomics with molecular subtype classifier Model 2 (J). Only features that were significantly associated with a pCR after adjustment for multiple comparisons are shown for each classifier category. The P-values correspond to the values produced after adjustment for multiple comparisons.

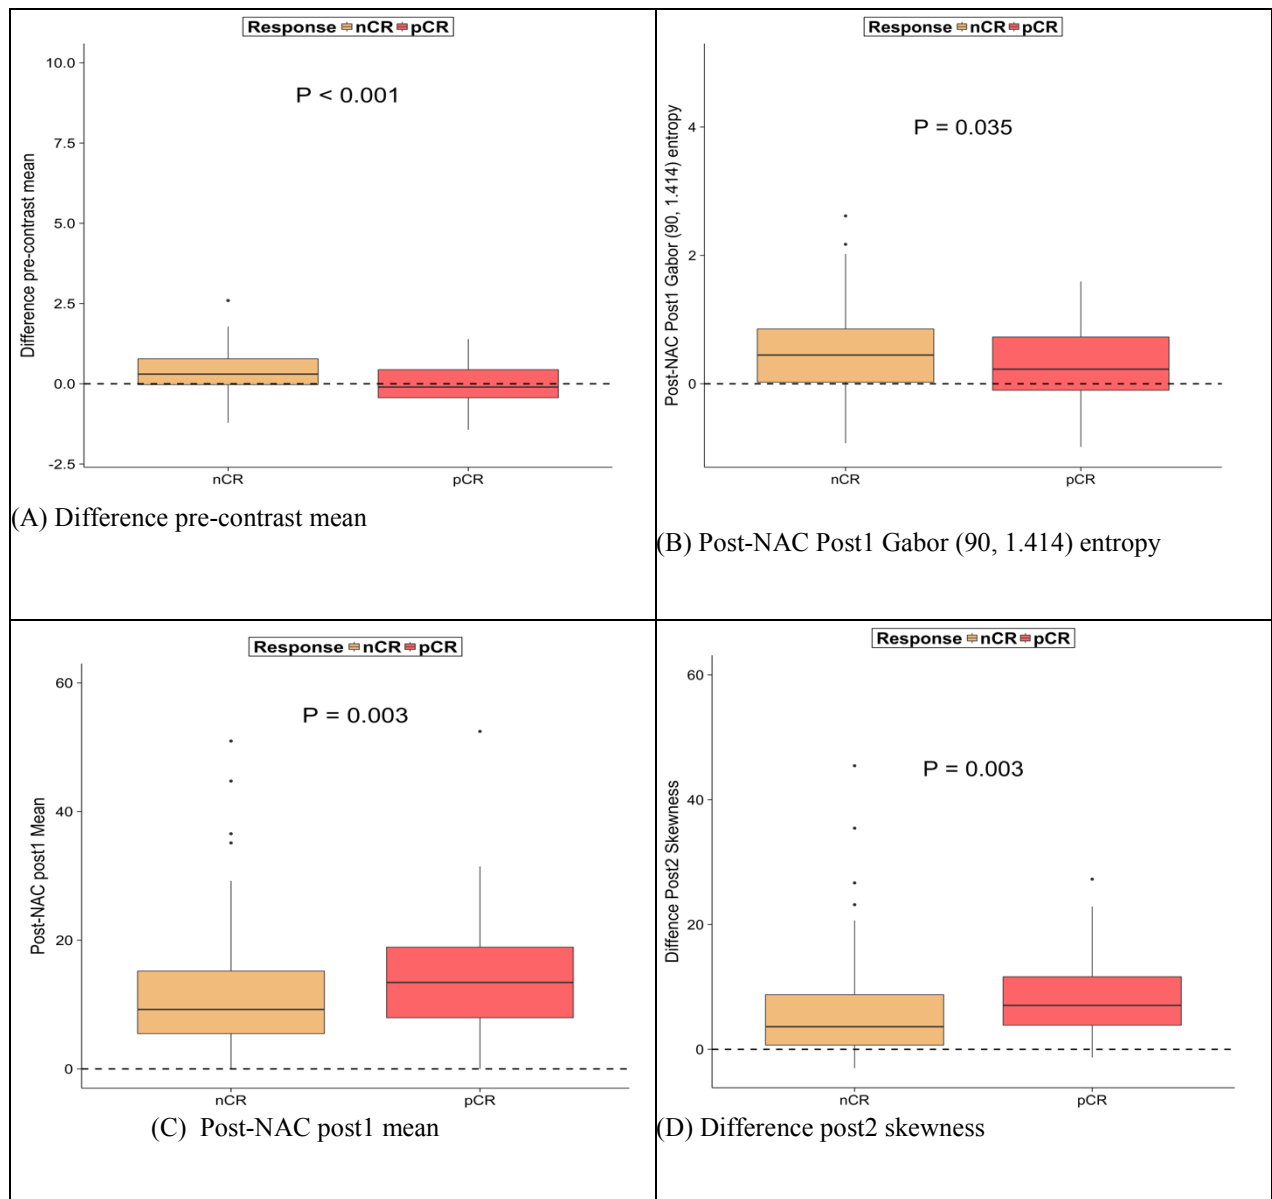

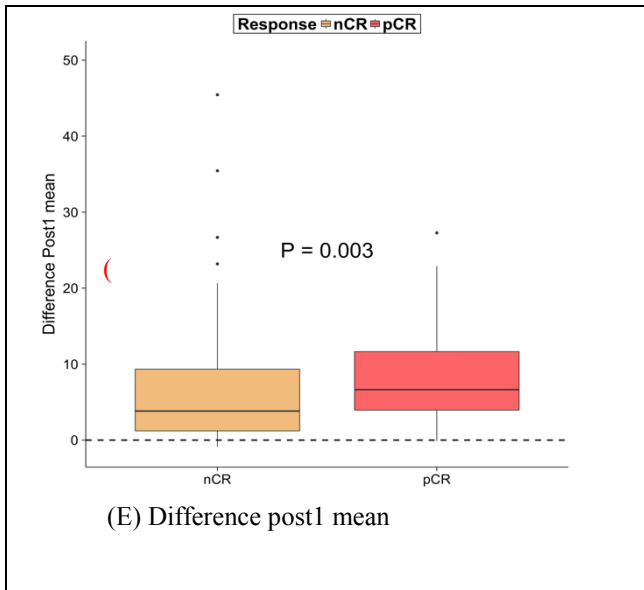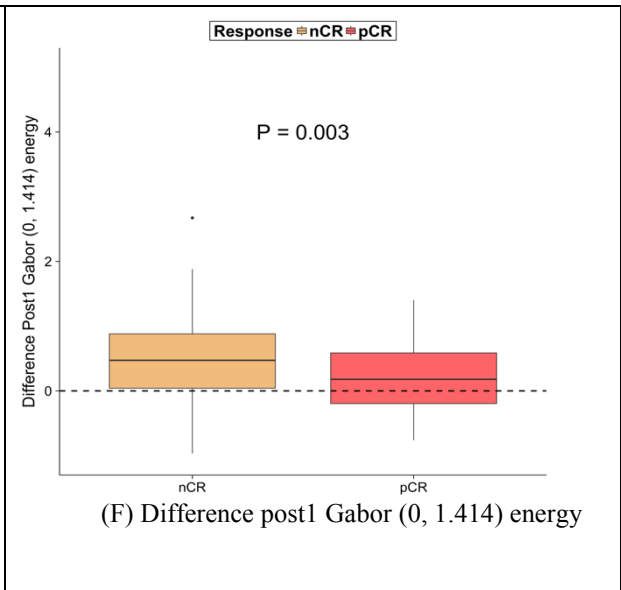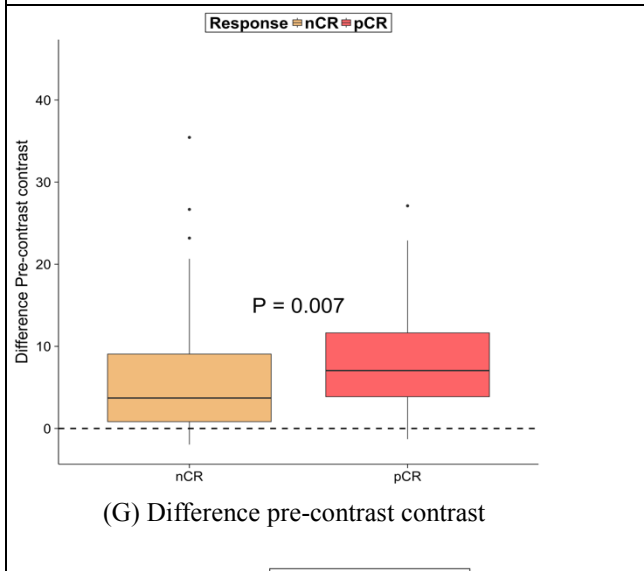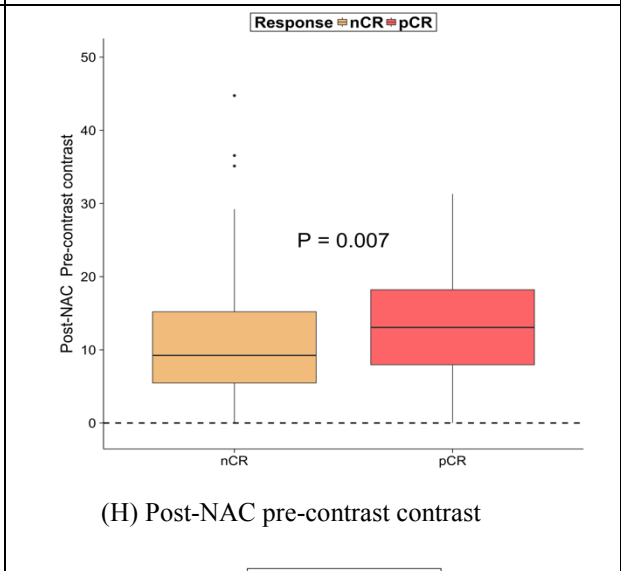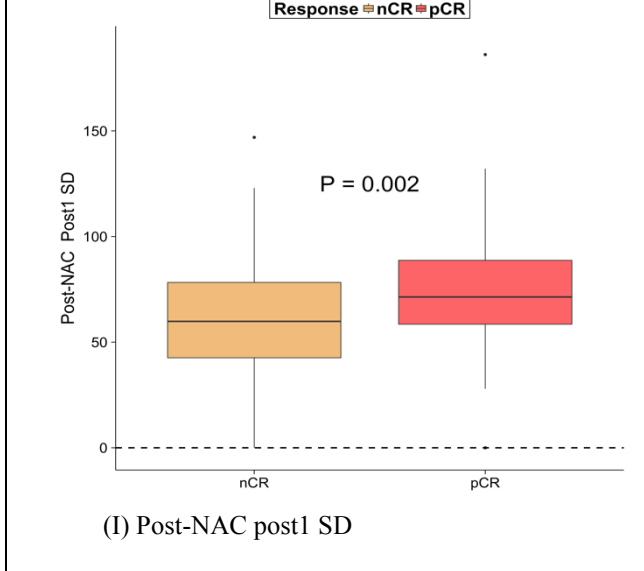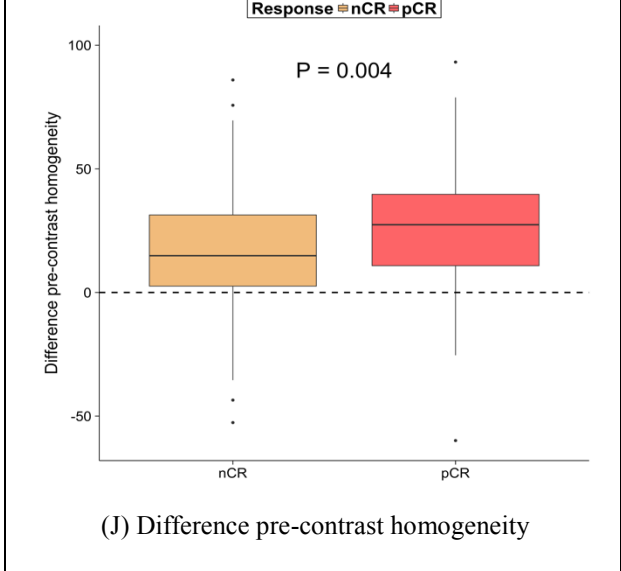

Supplement: MOESM3 [file 18026580]
